# Supplementary material for: Distinct Changes in Metabolic Profile and Sensory Quality with Different Varieties of Chrysanthemum (Juhua) Tea Measured by LC-MS-Based Untargeted Metabolomics and Electronic Tongue
Source: MDPI journal article supplement (doi:10.3390/foods13071080), 2024-04-01
Supplement: s1 [file s1]

## Supplementary Material

### Figure

Figure S1. The HPLC chromatogram of the five different varieties of *chrysanthemum* tea.

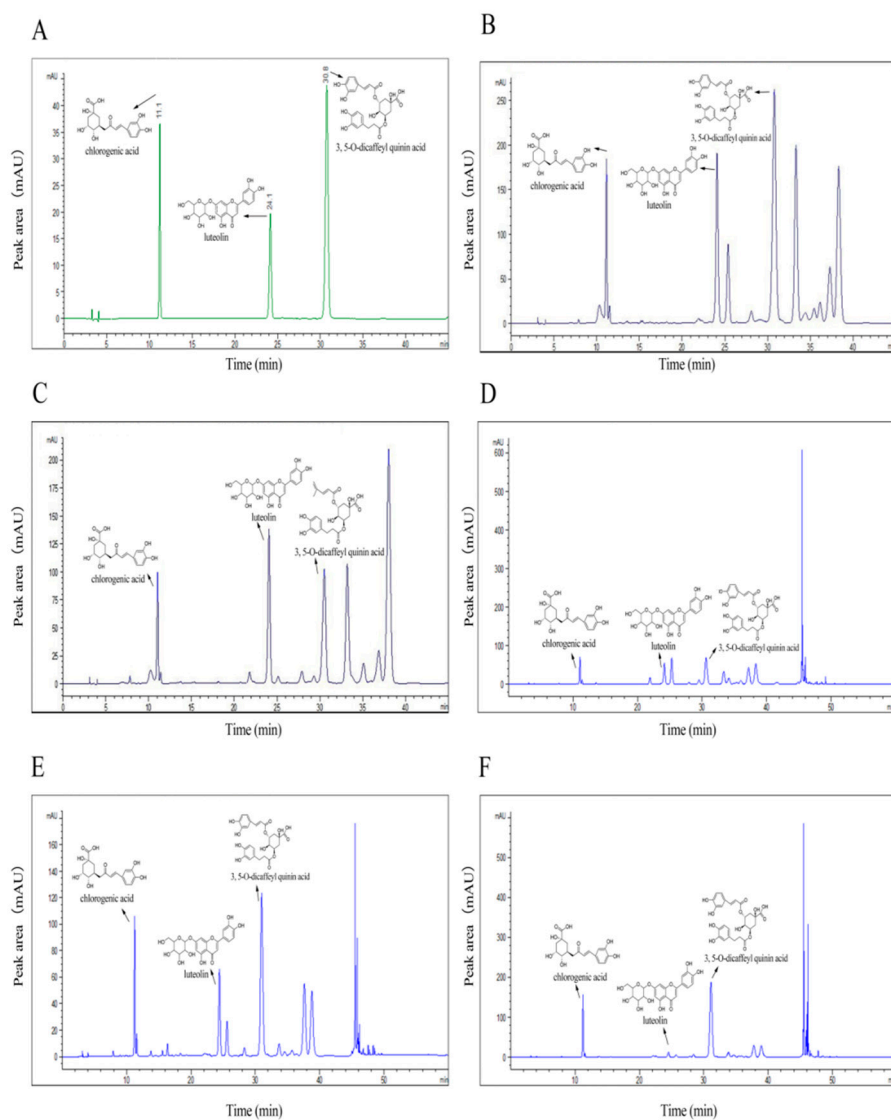

**Fig.S1 The HPLC chromatogram of the five different varieties of *chrysanthemum* tea.** (A) The HPLC chromatogram of the mixed sample standard ( chlorogenic acid, luteolin, and 3, 5-O-dicaffeoyl quinic acid ) ; (B)The HPLC chromatogram of 'Huangju' (X) O-dicaffeoyl quinic acid ) ; (C) The HPLC chromatogram of 'Jingsihuangju'(J) ;(D) The HPLC chromatogram of 'Boju'(B); (E) The HPLC chromatogram of 'Gongju'(G); (F) The HPLC chromatogram of 'Hangbaiju'(G);

**Figure S2 The TIC diagram in the ESI positive and negative modes for the five different varieties of *chrysanthemum* tea**

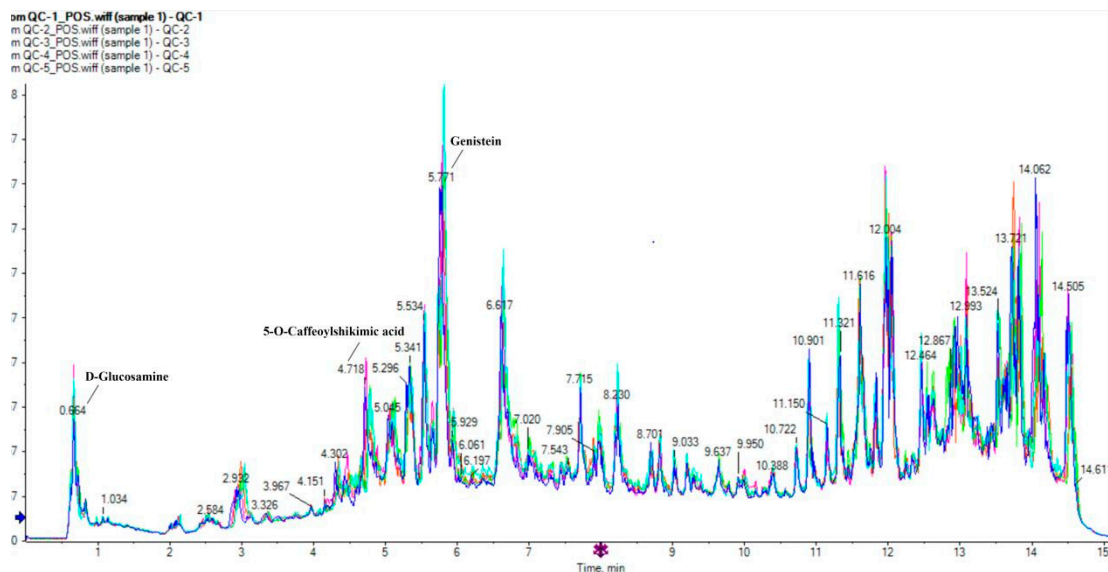

**Figure S2-a The TIC diagram in the ESI positive modes for the five different varieties of *chrysanthemum* tea**  
( Note: The abscissa represents the retention time of each chromatographic peak, and the ordinate represents the intensity value of the peak).

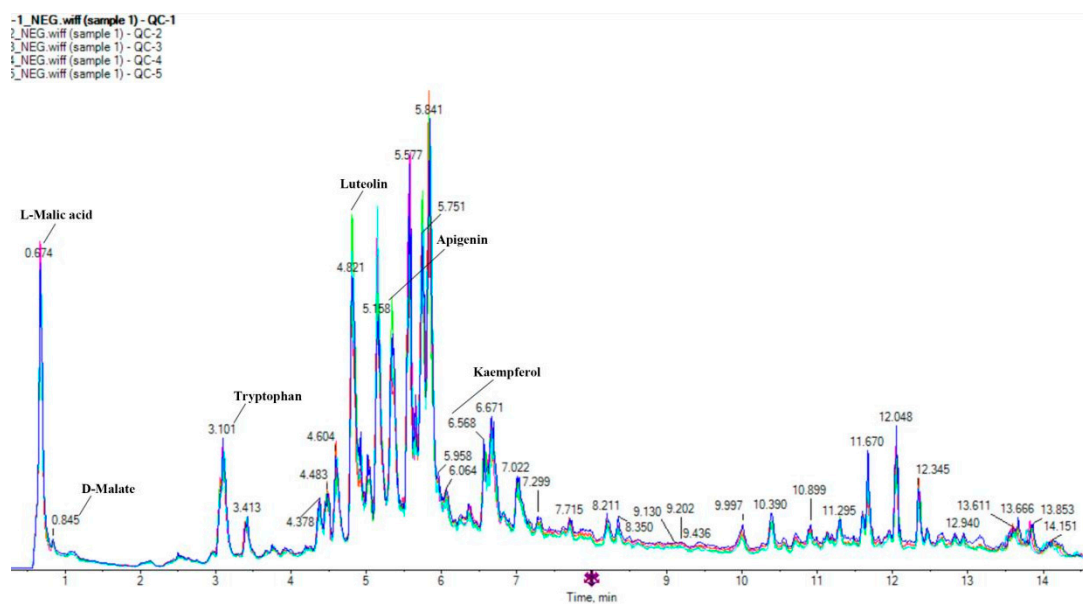

**Figure S2-b The TIC diagram in the ESI negative modes for the five different varieties of *chrysanthemum* tea**  
( Note: The abscissa represents the retention time of each chromatographic peak, and the ordinate represents the intensity value of the peak).

# Table

**Table S1 Contents of main bioactive substances of five different varieties of *chrysanthemum* tea**

| <i>Chrysanthemum</i> varieties |                          |                          |                          |                          |                          |
|--------------------------------|--------------------------|--------------------------|--------------------------|--------------------------|--------------------------|
| Dry matter content (%)         | J                        | X                        | H                        | B                        | G                        |
| Chlorogenic acid               | 1.23 ± 0.03 <sup>c</sup> | 2.11 ± 0.01 <sup>a</sup> | 1.55 ± 0.02 <sup>b</sup> | 0.66 ± 0.05 <sup>e</sup> | 1.01 ± 0.01 <sup>d</sup> |
| Galuteolin                     | 1.82 ± 0.01 <sup>b</sup> | 2.62 ± 0.01 <sup>a</sup> | 0.18 ± 0.01 <sup>e</sup> | 0.67 ± 0.05 <sup>d</sup> | 0.83 ± 0.02 <sup>c</sup> |
| Isochlorogenic acid            | 2.13 ± 0.04 <sup>d</sup> | 5.93 ± 0.02 <sup>a</sup> | 4.01 ± 0.10 <sup>b</sup> | 1.26 ± 0.11 <sup>e</sup> | 2.42 ± 0.03 <sup>c</sup> |

Standard error of means (n = 3), <sup>a-d</sup> Means within the same row with different superscript differ significantly (*P* < 0.05)

**Table S2 Critical Compounds Metabolites Responsible for the Metabolomics Variation Caused between X and J Samples ((VIP>1, *P* < 0.01)**

| No. | ID        | Compounds                                                                              | Formula                                         | m/z    | RT (min) | Superclass                       | VIP   |
|-----|-----------|----------------------------------------------------------------------------------------|-------------------------------------------------|--------|----------|----------------------------------|-------|
| 1   | NEG_16900 | 3-(Hexopyranosyloxy)-2-hydroxypropyl ester, (9Z,12Z,15Z)-9,12,15-octadecatrienoic acid | C <sub>27</sub> H <sub>46</sub> O <sub>9</sub>  | 559.30 | 10.976   | Lipids and lipid-like molecules  | 1.429 |
| 2   | NEG_18146 | Tiliroside                                                                             | C <sub>30</sub> H <sub>26</sub> O <sub>13</sub> | 593.12 | 6.595    | Phenylpropanoids and polyketides | 2.71  |
| 3   | NEG_4360  | Acacetin                                                                               | C <sub>16</sub> H <sub>12</sub> O <sub>5</sub>  | 283.06 | 6.603    | Phenylpropanoids and polyketides | 4.879 |
| 4   | NEG_17566 | Apigenin-7-O-neohesperidoside                                                          | C <sub>27</sub> H <sub>30</sub> O <sub>14</sub> | 577.15 | 5.678    |                                  | 3.371 |
| 5   | NEG_653   | Cinnamic acid                                                                          | C <sub>9</sub> H <sub>8</sub> O <sub>2</sub>    | 147.04 | 3.614    | Phenylpropanoids and polyketides | 1.345 |
| 6   | NEG_978   | L-(-)-3-Phenyllactic acid                                                              | C <sub>9</sub> H <sub>10</sub> O <sub>3</sub>   | 165.05 | 3.614    | Phenylpropanoids and polyketides | 1.558 |
| 7   | NEG_8089  | Chrysosplenetin                                                                        | C <sub>19</sub> H <sub>18</sub> O <sub>8</sub>  | 373.09 | 7.691    | Phenylpropanoids and polyketides | 3.689 |
| 8   | NEG_19601 | Acacetin-7-O-rutinoside                                                                | C <sub>28</sub> H <sub>32</sub> O <sub>14</sub> | 637.17 | 6.595    |                                  | 1.795 |
| 9   | NEG_7582  | Jaceidin                                                                               | C <sub>18</sub> H <sub>16</sub> O <sub>8</sub>  | 359.07 | 7.686    | Phenylpropanoids and polyketides | 2.292 |
| 10  | NEG_11058 | (Z)-2,6-Dimethyl-7-(4-methyl-5-oxooxolan-2-yl)-3-[[3,4,5-trihydroxy-6-                 | C <sub>21</sub> H <sub>34</sub> O <sub>10</sub> | 445.20 | 6.76     | Lipids and lipid-like molecules  | 1.144 |

|    |           |                                                                                                     |                                                               |        |       |                                  |       |
|----|-----------|-----------------------------------------------------------------------------------------------------|---------------------------------------------------------------|--------|-------|----------------------------------|-------|
|    |           | (hydroxymethyl)oxan-2-yl]oxymethyl]hept-5-enoic acid                                                |                                                               |        |       |                                  |       |
| 11 | NEG_7051  | 5,7,3',4'-Tetrahydroxy-6,8-dimethoxyflavone                                                         | C <sub>17</sub> H <sub>14</sub> O <sub>8</sub>                | 345.05 | 6.73  | Phenylpropanoids and polyketides | 1.326 |
| 12 | NEG_14917 | Deacetoxy(7)-7-oxokhivorinic acid                                                                   | C <sub>27</sub> H <sub>36</sub> O <sub>10</sub>               | 519.22 | 7.492 | Organoheterocyclic compounds     | 2.419 |
| 13 | NEG_14776 | 12-Acetoxyganoderic acid                                                                            | C <sub>30</sub> H <sub>46</sub> O <sub>7</sub>                | 517.20 | 7.188 | Lipids and lipid-like molecules  | 3.522 |
| 14 | NEG_11153 | Astragalin                                                                                          | C <sub>21</sub> H <sub>20</sub> O <sub>11</sub>               | 447.09 | 5.719 | Phenylpropanoids and polyketides | 1.868 |
| 15 | NEG_6294  | 1-(4-Hydroxyphenyl)-3-[(2R,3R,4S,5S,6R)-3,4,5-trihydroxy-6-(hydroxymethyl)oxan-2-yl]oxypropan-1-one | C <sub>15</sub> H <sub>20</sub> O <sub>8</sub>                | 327.10 | 3.449 | Lipids and lipid-like molecules  | 1.293 |
| 16 | NEG_467   | L-Malic acid                                                                                        | C <sub>4</sub> H <sub>6</sub> O <sub>5</sub>                  | 133.01 | 0.667 | Organic acids and derivatives    | 2.056 |
| 17 | NEG_286   | Hexanoic acid                                                                                       | C <sub>6</sub> H <sub>12</sub> O <sub>2</sub>                 | 115.00 | 0.667 | Lipids and lipid-like molecules  | 1.195 |
| 18 | NEG_4756  | N-Fructosyl pyroglutamate                                                                           | C <sub>11</sub> H <sub>17</sub> NO <sub>8</sub>               | 290.08 | 0.686 |                                  | 1.773 |
| 19 | NEG_1722  | Tryptophan                                                                                          | C <sub>11</sub> H <sub>12</sub> N <sub>2</sub> O <sub>2</sub> | 203.08 | 2.935 | Organoheterocyclic compounds     | 1.784 |
| 20 | NEG_10356 | Vitexin                                                                                             | C <sub>21</sub> H <sub>20</sub> O <sub>10</sub>               | 431.09 | 5.144 | Phenylpropanoids and polyketides | 1.073 |
| 21 | NEG_5261  | Bracteatin                                                                                          | C <sub>15</sub> H <sub>10</sub> O <sub>7</sub>                | 301.03 | 6.559 | Phenylpropanoids and polyketides | 1.006 |
| 22 | NEG_1272  | 2',6'-Dihydroxy-4'-methoxyacetophenone                                                              | C <sub>9</sub> H <sub>10</sub> O <sub>4</sub>                 | 181.04 | 6.277 | Organic oxygen compounds         | 2.581 |
| 23 | NEG_22238 | PG 34:3                                                                                             | C <sub>40</sub> H <sub>73</sub> O <sub>10</sub> P             | 743.48 | 13.79 |                                  | 1.185 |
| 24 | NEG_280   | Proline                                                                                             | C <sub>5</sub> H <sub>9</sub> NO <sub>2</sub>                 | 114.05 | 0.681 | Organic acids and derivatives    | 1.898 |
| 25 | NEG_11166 | Maritimein                                                                                          | C <sub>21</sub> H <sub>20</sub> O <sub>11</sub>               | 447.09 | 6.103 | Phenylpropanoids and polyketides | 1.221 |
| 26 | NEG_4472  | Luteolin                                                                                            | C <sub>15</sub> H <sub>10</sub> O <sub>6</sub>                | 285.03 | 4.796 | Phenylpropanoids and polyketides | 1.176 |
| 27 | NEG_10472 | Naringenin-7-O-glucoside                                                                            | C <sub>21</sub> H <sub>22</sub> O <sub>10</sub>               | 433.11 | 5.482 |                                  | 1.334 |
| 28 | NEG_10355 | Apigenin-7-O-glucoside                                                                              | C <sub>21</sub> H <sub>20</sub> O <sub>10</sub>               | 431.09 | 5.732 |                                  | 9.201 |
| 29 | NEG_3694  | Apigenin                                                                                            | C <sub>15</sub> H <sub>10</sub> O <sub>5</sub>                | 269.04 | 5.196 | Phenylpropanoids and polyketides | 1.199 |
| 30 | NEG_4490  | Kaempferol                                                                                          | C <sub>15</sub> H <sub>10</sub> O <sub>6</sub>                | 285.03 | 6.563 | Phenylpropanoids and polyketides | 6.100 |
| 31 | NEG_11024 | Apigenin 7-O-glucuronide                                                                            | C <sub>21</sub> H <sub>18</sub> O <sub>11</sub>               | 445.07 | 5.195 | Phenylpropanoids and polyketides | 4.589 |
| 32 | NEG_11964 | Dalbinol                                                                                            | C <sub>23</sub> H <sub>22</sub> O <sub>8</sub>                | 463.08 | 4.437 | Phenylpropanoids and             | 9.344 |

|    |           |                                                                                                  |                                                               |        |        |                                  |       |
|----|-----------|--------------------------------------------------------------------------------------------------|---------------------------------------------------------------|--------|--------|----------------------------------|-------|
|    |           |                                                                                                  |                                                               |        |        | polyketides                      |       |
| 33 | NEG_8114  | 2-[2-[(Z)-pent-2-enyl]-3-[3,4,5-trihydroxy-6-(hydroxymethyl)oxan-2-yl]oxycyclopentyl]acetic acid | C <sub>18</sub> H <sub>30</sub> O <sub>8</sub>                | 373.18 | 6.491  | Lipids and lipid-like molecules  | 1.100 |
| 34 | NEG_3828  | Naringenin                                                                                       | C <sub>15</sub> H <sub>12</sub> O <sub>5</sub>                | 271.06 | 6.547  | Phenylpropanoids and polyketides | 1.707 |
| 35 | NEG_6438  | 9,12,13-Trihydroxyoctadec-10-enoic acid                                                          | C <sub>18</sub> H <sub>34</sub> O <sub>5</sub>                | 329.23 | 7.565  | Lipids and lipid-like molecules  | 1.281 |
| 36 | NEG_11149 | Orientin                                                                                         | C <sub>21</sub> H <sub>20</sub> O <sub>11</sub>               | 447.08 | 4.914  | Phenylpropanoids and polyketides | 1.511 |
| 37 | NEG_6320  | 9,10-Dihydroxy-8-oxooctadec-12-enoic acid                                                        | C <sub>18</sub> H <sub>32</sub> O <sub>5</sub>                | 327.21 | 7.342  | Lipids and lipid-like molecules  | 1.693 |
| 38 | NEG_11171 | Luteolin-7-O-glucoside                                                                           | C <sub>21</sub> H <sub>20</sub> O <sub>11</sub>               | 447.09 | 5.353  |                                  | 6.826 |
| 39 | NEG_466   | D-Malate                                                                                         | C <sub>4</sub> H <sub>6</sub> O <sub>5</sub>                  | 133.01 | 0.837  | Organic acids and derivatives    | 1.045 |
| 40 | NEG_24704 | Baicalin                                                                                         | C <sub>21</sub> H <sub>18</sub> O <sub>11</sub>               | 891.16 | 5.196  | Phenylpropanoids and polyketides | 1.349 |
| 41 | NEG_11289 | Eriodictyol-7-O-glucoside                                                                        | C <sub>21</sub> H <sub>22</sub> O <sub>11</sub>               | 449.10 | 5.031  | Phenylpropanoids and polyketides | 2.142 |
| 42 | NEG_3562  | 5,9-Dihydroxy-5,7,7-trimethyl-4,5a,6,8,8a,9-hexahydro-1H-azuleno[5,6-c]furan-3-one               | C <sub>15</sub> H <sub>22</sub> O <sub>4</sub>                | 265.15 | 6.751  | Lipids and lipid-like molecules  | 1.459 |
| 43 | NEG_19227 | Quercetin 3-O-sophoroside                                                                        | C <sub>15</sub> H <sub>10</sub> O <sub>7</sub>                | 625.14 | 3.99   | Flavonoid glycosides             | 1.387 |
| 44 | NEG_4873  | Glutamylphenylalanine                                                                            | C <sub>14</sub> H <sub>18</sub> N <sub>2</sub> O <sub>5</sub> | 293.12 | 3.246  | Organic acids and derivatives    | 1.010 |
| 45 | NEG_5743  | Cirsimaritin                                                                                     | C <sub>17</sub> H <sub>14</sub> O <sub>6</sub>                | 313.06 | 7.576  | Phenylpropanoids and polyketides | 1.205 |
| 46 | NEG_11449 | 2-Azaniumylethyl (3-hexadecanoyloxy-2-hydroxypropyl) phosphate                                   | C <sub>21</sub> H <sub>44</sub> NO <sub>7</sub> P             | 452.27 | 11.601 | Lipids and lipid-like molecules  | 1.927 |
| 47 | NEG_6974  | Eupatilin                                                                                        | C <sub>18</sub> H <sub>16</sub> O <sub>7</sub>                | 343.08 | 7.627  | Phenylpropanoids and polyketides | 1.868 |
| 48 | NEG_7382  | Neochlorogenic acid                                                                              | C <sub>16</sub> H <sub>18</sub> O <sub>9</sub>                | 353.08 | 2.215  | Organic oxygen compounds         | 1.943 |
| 49 | NEG_4998  | 9-Hydroxy-10E,12Z-octadecadienoic acid                                                           | C <sub>18</sub> H <sub>32</sub> O <sub>3</sub>                | 295.22 | 10.35  | Lipids and lipid-like molecules  | 3.284 |
| 50 | NEG_4305  | trans-Vaccenic acid                                                                              | C <sub>18</sub> H <sub>34</sub> O <sub>2</sub>                | 281.24 | 12.421 | Lipids and lipid-like molecules  | 1.740 |
| 51 | NEG_7372  | 3-[3-(3,4-Dihydroxyphenyl)prop-2-enoyloxy]-1,4,5-trihydroxycyclohexane-1-                        | C <sub>16</sub> H <sub>18</sub> O <sub>9</sub>                | 353.08 | 2.162  | Organic oxygen compounds         | 2.032 |

|    |           |                                                                                                                     |                                                                 |         |        |                                  |       |
|----|-----------|---------------------------------------------------------------------------------------------------------------------|-----------------------------------------------------------------|---------|--------|----------------------------------|-------|
|    |           | carboxylic acid                                                                                                     |                                                                 |         |        |                                  |       |
| 52 | NEG_23892 | PI 34:2                                                                                                             | C <sub>43</sub> H <sub>79</sub> O <sub>13</sub> P               | 833.51  | 14.046 |                                  | 3.259 |
| 53 | NEG_15572 | Flavone base + 4O, O-MalonylHex                                                                                     | C <sub>24</sub> H <sub>22</sub> O <sub>14</sub>                 | 533.09  | 5.53   | Phenylpropanoids and polyketides | 5.904 |
| 54 | NEG_1153  | 2-Isopropylmalic acid                                                                                               | C <sub>7</sub> H <sub>12</sub> O <sub>5</sub>                   | 175.06  | 2.404  | Lipids and lipid-like molecules  | 1.234 |
| 55 | NEG_1446  | Quinic acid                                                                                                         | C <sub>7</sub> H <sub>12</sub> O <sub>6</sub>                   | 191.05  | 0.631  | Organic oxygen compounds         | 1.184 |
| 56 | NEG_3875  | FA 16:0;2O                                                                                                          | C <sub>16</sub> H <sub>32</sub> O <sub>3</sub>                  | 271.22  | 11.353 | Lipids and lipid-like molecules  | 1.308 |
| 57 | NEG_4907  | 9-HOTrE                                                                                                             | C <sub>18</sub> H <sub>30</sub> O <sub>3</sub>                  | 293.21  | 9.951  | Lipids and lipid-like molecules  | 1.235 |
| 58 | NEG_3698  | Aloe-emodin                                                                                                         | C <sub>15</sub> H <sub>10</sub> O <sub>5</sub>                  | 269.04  | 5.646  | Benzenoids                       | 5.655 |
| 59 | NEG_12660 | [3-[2-Aminoethoxy(hydroxy)phosphoryl]oxy-2-hydroxypropyl]octadeca-9,12-dienoate                                     | C <sub>23</sub> H <sub>44</sub> NO <sub>7</sub> P               | 476.27  | 11.298 | Lipids and lipid-like molecules  | 1.001 |
| 60 | POS_14378 | 4-Acetyl-3-hydroxy-5-methylphenyl beta-D-glucopyranoside                                                            | C <sub>15</sub> H <sub>20</sub> O <sub>8</sub>                  | 351.10  | 3.534  | Organic oxygen compounds         | 1.370 |
| 61 | POS_10508 | (5xi,9xi)-12-Hydroxyabieta-7,13-dien-18-oic acid                                                                    | C <sub>20</sub> H <sub>30</sub> O <sub>3</sub>                  | 301.21  | 8.211  | Lipids and lipid-like molecules  | 1.609 |
| 62 | POS_20040 | Topotecan                                                                                                           | C <sub>23</sub> H <sub>23</sub> N <sub>3</sub> O <sub>5</sub>   | 422.17  | 3.946  | Alkaloids and derivatives        | 2.924 |
| 63 | POS_17988 | 7-Hydroxy-5-methyl-2-(2-oxopropyl)-8-[3,4,5-trihydroxy-6-(hydroxymethyl)-2-oxanyl]-1-benzopyran-4-one               | C <sub>19</sub> H <sub>22</sub> O <sub>9</sub>                  | 395.13  | 3.567  | Organic oxygen compounds         | 2.593 |
| 64 | POS_19227 | 3-O-Methylfunicone                                                                                                  | C <sub>20</sub> H <sub>20</sub> O <sub>8</sub>                  | 411.10  | 8.237  | Organic oxygen compounds         | 2.319 |
| 65 | POS_15259 | Fenofibrate                                                                                                         | C <sub>20</sub> H <sub>21</sub> ClO <sub>4</sub>                | 361.125 | 4.068  | Benzenoids                       | 1.086 |
| 66 | POS_6344  | Thunalbene                                                                                                          | C <sub>15</sub> H <sub>14</sub> O <sub>3</sub>                  | 243.098 | 7.335  | Phenylpropanoids and polyketides | 1.238 |
| 67 | POS_17448 | Pyraclostrobin                                                                                                      | C <sub>19</sub> H <sub>18</sub> ClN <sub>3</sub> O <sub>4</sub> | 388.106 | 9.369  | Organoheterocyclic compounds     | 3.075 |
| 68 | POS_31781 | Kaempferol-3,7-O-bis-alpha-L-rhamnoside                                                                             | C <sub>27</sub> H <sub>30</sub> O <sub>14</sub>                 | 579.170 | 5.681  | Phenylpropanoids and polyketides | 3.348 |
| 69 | POS_15557 | 1,17,19-Trihydroxy-7-methyl-3-oxapentacyclo[9.8.0.02,4.05,10.013,18]nonadeca-5(10),13(18),14,16-tetraene-9,12-dione | C <sub>19</sub> H <sub>18</sub> O <sub>6</sub>                  | 365.084 | 3.723  | Benzenoids                       | 1.380 |
| 70 | POS_23706 | Monotropitoside                                                                                                     | C <sub>19</sub> H <sub>26</sub> O <sub>12</sub>                 | 469.131 | 4.675  | Organic oxygen compounds         | 3.107 |
| 71 | POS_28038 | 3,5,5-Trimethyl-4-[3-[(6-O-beta-                                                                                    | C <sub>24</sub> H <sub>40</sub> O <sub>11</sub>                 | 527.236 | 7.078  | Lipids and lipid-like            | 2.002 |

|    |           |                                                                                                                                                                                          |                                                   |         |        |                                  |        |
|----|-----------|------------------------------------------------------------------------------------------------------------------------------------------------------------------------------------------|---------------------------------------------------|---------|--------|----------------------------------|--------|
|    |           | D-xylopyranosyl-beta-D-glucopyranosyl)oxy]butyl]-2-cyclohexen-1-one                                                                                                                      |                                                   |         |        | molecules                        |        |
| 72 | POS_21718 | 11,12,13-Trihydroxy-4,5,8-trimethyl-3-(2-methylpropyl)-1H,2H,3H,4H,6aH,9H,10H,11H,12H,13H,14H,15H,15bH-cycloundeca[e]isoindole-1,15-dione                                                | C <sub>24</sub> H <sub>37</sub> NO <sub>5</sub>   | 442.270 | 4.116  | Organoheterocyclic compounds     | 8.167  |
| 73 | POS_8718  | (3S,3aR,4S,9aS,9bR)-4-Hydroxy-9-(hydroxymethyl)-3,6-dimethyl-3,3a,4,5,9a,9b-hexahydroazuleno[4,5-b]furan-2,7-dione                                                                       | C <sub>15</sub> H <sub>18</sub> O <sub>5</sub>    | 279.121 | 4.679  | Organoheterocyclic compounds     | 1.401  |
| 74 | POS_21421 | Sayaendoside                                                                                                                                                                             | C <sub>19</sub> H <sub>28</sub> O <sub>10</sub>   | 439.151 | 5.727  | Organic oxygen compounds         | 1.306  |
| 75 | POS_27104 | Tauromuricholic acid                                                                                                                                                                     | C <sub>26</sub> H <sub>45</sub> NO <sub>7</sub> S | 516.306 | 9.139  | Lipids and lipid-like molecules  | 1.326  |
| 76 | POS_33486 | (S)-7-(((2-O-6-Deoxy-alpha-L-mannopyranosyl)-beta-D-glucopyranosyl)oxy)-2,3-dihydro-5-hydroxy-2-(3-hydroxy-4-methoxyphenyl)-4H-1-benzopyran-4-one                                        | C <sub>28</sub> H <sub>34</sub> O <sub>15</sub>   | 611.463 | 12.653 | Phenylpropanoids and polyketides | 4.196  |
| 77 | POS_21638 | Simvastatin                                                                                                                                                                              | C <sub>25</sub> H <sub>38</sub> O <sub>5</sub>    | 441.257 | 9.904  | Organoheterocyclic compounds     | 1.564  |
| 78 | POS_18121 | 3',5-Dihydroxy-3,4',5',7-tetramethoxyflavone                                                                                                                                             | C <sub>19</sub> H <sub>18</sub> O <sub>8</sub>    | 397.086 | 7.894  | Phenylpropanoids and polyketides | 1.978  |
| 79 | POS_22389 | (3R,3aR,4S,6S,7aR)-6-ethenyl-4-hydroxy-3,6-dimethyl-7-[(E)-1-[(2R,3R,4S,5S,6R)-3,4,5-trihydroxy-6-(hydroxymethyl)oxan-2-yl]oxyprop-1-en-2-yl]-3,3a,4,5,7,7a-hexahydro-1-benzofuran-2-one | C <sub>21</sub> H <sub>32</sub> O <sub>9</sub>    | 451.194 | 5.515  | Lipids and lipid-like molecules  | 1.002  |
| 80 | POS_29937 | Lutein                                                                                                                                                                                   |                                                   | 551.414 | 13.622 | Lipids and lipid-like molecules  | 1.294  |
| 81 | POS_21553 | 3-Hydroxy-2-[[3-(3-hydroxy-6-methylheptanoyl)oxy-8-methylnonanoyl]amino]propanoic acid                                                                                                   | C <sub>21</sub> H <sub>39</sub> NO <sub>7</sub>   | 440.252 | 4.864  | Organic acids and derivatives    | 15.676 |
| 82 | POS_6080  | [(6S,9aS)-6,9a-Dimethyl-1,3,4,5,5a,7,8,9-                                                                                                                                                | C <sub>15</sub> H <sub>24</sub> O <sub>2</sub>    | 237.185 | 8.258  | Organoheterocyclic compounds     | 1.298  |

|    |           |                                                                                                                                                                                                                                                                                                                                           |                                                 |         |        |                                  |       |
|----|-----------|-------------------------------------------------------------------------------------------------------------------------------------------------------------------------------------------------------------------------------------------------------------------------------------------------------------------------------------------|-------------------------------------------------|---------|--------|----------------------------------|-------|
| 83 | POS_6921  | octahydrobenzo[e][2]benzofuran-6-yl]methanol<br>3a-Hydroxy-3,5a,9-trimethyl-3a,4,5,5a,6,7,8,9b-octahydronaphtho[1,2-b]furan-2(3H)-one<br>3,3a,4,5,9a,9b-Hexahydro-9a-hydroxy-6,9-dimethyl-3-methylene-, (9aR,9bS)-azuleno[4,5-b]furan-2,7-dione                                                                                           | C <sub>15</sub> H <sub>22</sub> O <sub>3</sub>  | 251.166 | 6.813  | Lipids and lipid-like molecules  | 3.660 |
| 84 | POS_7479  | Sempervirine                                                                                                                                                                                                                                                                                                                              | C <sub>15</sub> H <sub>16</sub> O <sub>4</sub>  | 261.109 | 4.674  | Organoheterocyclic compounds     | 1.976 |
| 85 | POS_8297  | 5,5,9,13-tetramethyl-7-(phenylmethylidene)tetracyclo[11.2.1.01,10.04,9]hexadec-14-en-6-one<br>(2R,3S,4S,5R,6R)-2-(hydroxymethyl)-6-(2-hydroxy-2-methylbut-3-enoxy)oxane-3,4,5-triol<br>[(3Ar,4R,5R,6E,9Z,11aR)-4-hydroxy-6,10-dimethyl-3-methylidene-2,8-dioxo-4,5,11,11a-tetrahydro-3aH-cyclodeca[b]furan-5-yl] (Z)-2-methylbut-2-enoate | C <sub>19</sub> H <sub>16</sub> N <sub>2</sub>  | 273.145 | 8.467  | Organoheterocyclic compounds     | 1.243 |
| 86 | POS_16518 | Biochanin A 7-(6-malonylglucoside)                                                                                                                                                                                                                                                                                                        | C <sub>27</sub> H <sub>34</sub> O               | 375.266 | 11.26  |                                  | 1.032 |
| 87 | POS_9463  | Sinapaldehyde glucoside                                                                                                                                                                                                                                                                                                                   | C <sub>11</sub> H <sub>20</sub> O <sub>7</sub>  | 287.108 | 2.119  | Lipids and lipid-like molecules  | 1.676 |
| 88 | POS_16713 | Cafestol                                                                                                                                                                                                                                                                                                                                  | C <sub>20</sub> H <sub>24</sub> O <sub>6</sub>  | 378.183 | 7.47   | Lipids and lipid-like molecules  | 1.158 |
| 89 | POS_28471 | Isoschaftoside                                                                                                                                                                                                                                                                                                                            | C <sub>25</sub> H <sub>24</sub> O <sub>13</sub> | 533.133 | 6.642  | Phenylpropanoids and polyketides | 4.801 |
| 90 | POS_17813 | 22-Hydroxy-2-hopen-1-one                                                                                                                                                                                                                                                                                                                  | C <sub>17</sub> H <sub>22</sub> O <sub>9</sub>  | 393.111 | 5.05   | Organic oxygen compounds         | 2.966 |
| 91 | POS_11705 | 2-[[[3,4-Dihydroxy-4-(hydroxymethyl)oxolan-2-yl]oxymethyl]-6-[(6,6-dimethyl-4-bicyclo[3.1.1]hept-3-enyl)methoxy]oxane-3,4,5-triol                                                                                                                                                                                                         | C <sub>20</sub> H <sub>28</sub> O <sub>3</sub>  | 317.206 | 10.259 | Organoheterocyclic compounds     | 1.086 |
| 92 | POS_30933 | 2-Phenylethyl beta-D-glucopyranoside                                                                                                                                                                                                                                                                                                      | C <sub>26</sub> H <sub>28</sub> O <sub>14</sub> | 565.151 | 4.809  | Phenylpropanoids and polyketides | 1.237 |
| 93 | POS_21669 | (4Ar,5R,6R)-6-hydroxy-3-                                                                                                                                                                                                                                                                                                                  | C <sub>30</sub> H <sub>48</sub> O <sub>2</sub>  | 441.363 | 11.845 | Lipids and lipid-like molecules  | 1.619 |
| 94 | POS_23382 |                                                                                                                                                                                                                                                                                                                                           | C <sub>21</sub> H <sub>34</sub> O <sub>10</sub> | 464.246 | 6.769  | Lipids and lipid-like molecules  | 1.131 |
| 95 | POS_10541 |                                                                                                                                                                                                                                                                                                                                           | C <sub>14</sub> H <sub>20</sub> O <sub>6</sub>  | 302.159 | 5.092  | Organic oxygen compounds         | 1.231 |
| 96 | POS_4759  |                                                                                                                                                                                                                                                                                                                                           | C <sub>15</sub> H <sub>20</sub> O <sub>2</sub>  | 215.139 | 6.796  | Lipids and lipid-like molecules  | 1.528 |



|     |           |                                                                                                                               |                                                               |          |        |                                  |       |
|-----|-----------|-------------------------------------------------------------------------------------------------------------------------------|---------------------------------------------------------------|----------|--------|----------------------------------|-------|
|     |           | isopropenyl-4a,5-dimethyl-5,6,7,8-tetrahydronaphthalen-2-one                                                                  |                                                               |          |        | molecules                        |       |
| 97  | POS_10100 | 9-Oxo-octadeca-10,12-dienoic acid                                                                                             | C <sub>18</sub> H <sub>30</sub> O <sub>3</sub>                | 295.224  | 9.473  | Lipids and lipid-like molecules  | 1.101 |
| 98  | POS_21629 | N-Methyl-N-[(2E,4E,6E)-2,4,6-octatrienoyl]valylalanylprolinamide                                                              | C <sub>22</sub> H <sub>34</sub> N <sub>4</sub> O <sub>4</sub> | 441.236  | 6.894  | Organic acids and derivatives    | 1.712 |
| 99  | POS_31058 | 4-Oxogazaniaxanthin                                                                                                           | C <sub>40</sub> H <sub>54</sub> O <sub>2</sub>                | 567.416  | 12.568 | Lipids and lipid-like molecules  | 2.327 |
| 100 | POS_23401 | Delphinidin 3-glucoside                                                                                                       | [C <sub>21</sub> H <sub>21</sub> O <sub>12</sub> ]<br>+       | 465.101  | 5.151  | Phenylpropanoids and polyketides | 1.018 |
| 101 | POS_33626 | 5-Hydroxy-3-(4-methoxyphenyl)-7-[3,4,5-trihydroxy-6-[(3,4,5-trihydroxy-6-methyloxan-2-yl)oxymethyl]oxan-2-yl]oxychromen-4-one | C <sub>28</sub> H <sub>32</sub> O <sub>14</sub>               | 615.165  | 6.606  | Phenylpropanoids and polyketides | 1.236 |
| 102 | POS_36352 | Rutaresin                                                                                                                     | C <sub>31</sub> H <sub>30</sub> O <sub>16</sub>               | 681.1422 | 6.593  | Phenylpropanoids and polyketides | 4.461 |
| 103 | POS_4919  | Pymetrozine                                                                                                                   | C <sub>10</sub> H <sub>11</sub> N <sub>5</sub> O              | 218.101  | 3.993  | Benzenoids                       | 1.033 |
| 104 | POS_20872 | beta-D-Glucopyranoside, 4-hydroxy-5-methyl-2-(1-methylethyl)phenyl, 6-(2-carboxyacetate)                                      | C <sub>19</sub> H <sub>26</sub> O <sub>10</sub>               | 432.179  | 5.064  | Lipids and lipid-like molecules  | 1.376 |
| 105 | POS_18049 | Fucosterol                                                                                                                    | C <sub>29</sub> H <sub>48</sub> O                             | 395.365  | 12.632 | Lipids and lipid-like molecules  | 1.075 |
| 106 | POS_10105 | (9E,11Z)-13-Oxo-9,11-octadecadienoic acid                                                                                     | C <sub>18</sub> H <sub>30</sub> O <sub>3</sub>                | 295.226  | 10.261 | Lipids and lipid-like molecules  | 1.530 |
| 107 | POS_30165 | (-)-Maackiain-3-O-glucosyl-6"-O-malonate                                                                                      | C <sub>25</sub> H <sub>24</sub> O <sub>13</sub>               | 555.108  | 6.642  | Phenylpropanoids and polyketides | 1.165 |
| 108 | POS_15590 | 7,8-Dihydroxycalonectrin                                                                                                      | C <sub>19</sub> H <sub>26</sub> O <sub>8</sub>                | 365.153  | 5.159  | Lipids and lipid-like molecules  | 1.372 |
| 109 | POS_21418 | Phenethyl 2-O-(beta-D-xylopyranosyl)-beta-D-glucopyranoside                                                                   | C <sub>19</sub> H <sub>28</sub> O <sub>10</sub>               | 439.149  | 5.406  | Organic oxygen compounds         | 1.413 |
| 110 | POS_22368 | (2R,2S)-Eriodictyol 7-O-beta-D-glucoside                                                                                      | C <sub>21</sub> H <sub>22</sub> O <sub>11</sub>               | 451.122  | 5.035  | Phenylpropanoids and polyketides | 2.060 |
| 111 | POS_29451 | Triferric doxorubicin                                                                                                         | C <sub>27</sub> H <sub>29</sub> NO <sub>11</sub>              | 544.179  | 5.763  | Phenylpropanoids and polyketides | 3.502 |
| 112 | POS_4391  | Sinapoyl malate                                                                                                               | C <sub>15</sub> H <sub>16</sub> O <sub>9</sub>                | 207.137  | 4.628  | Phenylpropanoids and polyketides | 1.236 |
| 113 | POS_1293  | Trigonelline HCl                                                                                                              | C <sub>7</sub> H <sub>7</sub> NO <sub>2</sub> .H<br>Cl        | 138.055  | 0.666  |                                  | 1.221 |
| 114 | POS_32891 | Violanthin                                                                                                                    | C <sub>27</sub> H <sub>30</sub> O <sub>14</sub>               | 601.152  | 5.693  | Phenylpropanoids and             | 2.430 |

|     |           |                                                                                                                           |                                                               |          |        |                                           |              |
|-----|-----------|---------------------------------------------------------------------------------------------------------------------------|---------------------------------------------------------------|----------|--------|-------------------------------------------|--------------|
|     |           |                                                                                                                           |                                                               |          |        | polyketides                               |              |
| 115 | POS_33707 | Kaempferol 3-O-beta-D-glucopyranosyl-7-O-alpha-L-rhamnopyranoside                                                         | C <sub>27</sub> H <sub>30</sub> O <sub>15</sub>               | 617.146  | 5.341  | Phenylpropanoids and polyketides          | 1.911        |
| 116 | POS_29757 | Flavone base + 3O, 1MeO, O-MalonylHex                                                                                     | C <sub>25</sub> H <sub>24</sub> O <sub>14</sub>               | 549.116  | 5.943  | Phenylpropanoids and polyketides          | 1.695        |
| 117 | POS_21371 | Lunarine                                                                                                                  | C <sub>25</sub> H <sub>31</sub> N <sub>3</sub> O <sub>4</sub> | 438.231  | 4.844  | Phenylpropanoids and polyketides          | 2.2391       |
| 118 | POS_31471 | 3-{7-[5-(1-hydroxyhenicosa-4,8-dien-1-yl)oxolan-2-yl]heptyl}-5-methyl-5H-furan-2-one                                      | C <sub>37</sub> H <sub>64</sub> O <sub>4</sub>                | 573.484  | 13.921 |                                           | 2.663        |
| 119 | POS_5800  | Isoalantolactone                                                                                                          | C <sub>15</sub> H <sub>20</sub> O <sub>2</sub>                | 233.151  | 8.014  | Lipids and lipid-like molecules           | 1.559        |
| 120 | POS_5743  | alpha-Pyrrolidinovalerophenone                                                                                            | C <sub>15</sub> H <sub>21</sub> NO                            | 232.1679 | 8.268  | Organic oxygen compounds                  | 1.575        |
| 121 | POS_39499 | N1,N5,N10,N14-Tetra-trans-p-coumaroylspermine                                                                             | C <sub>46</sub> H <sub>50</sub> N <sub>4</sub> O <sub>8</sub> | 787.372  | 7.006  | Phenylpropanoids and polyketides          | 1.5905<br>0  |
| 122 | POS_13176 | 5-O-Caffeoylshikimic acid                                                                                                 | C <sub>16</sub> H <sub>16</sub> O <sub>8</sub>                | 337.084  | 4.758  | Phenylpropanoids and polyketides          | 1.328        |
| 123 | POS_6063  | 3,7-Epoxycaryophyllan-6-One                                                                                               | C <sub>15</sub> H <sub>24</sub> O <sub>2</sub>                | 237.1826 | 7.572  | Organoheterocyclic compounds              | 1.2343<br>67 |
| 124 | POS_9312  | Retinal                                                                                                                   | C <sub>20</sub> H <sub>28</sub> O                             | 285.2187 | 9.92   | Lipids and lipid-like molecules           | 1.0188<br>04 |
| 125 | POS_6911  | 2-[(2R,4aS,7R)-7-Hydroxy-4a-methyl-8-methylenedecahydro-2-naphthalenyl]acrylic acid                                       | C <sub>15</sub> H <sub>22</sub> O <sub>3</sub>                | 251.1643 | 7.821  | Lipids and lipid-like molecules           | 1.5261<br>48 |
| 126 | POS_29643 | 3-(4-{[1,3-Dihydroxy-1-(4-hydroxy-3-methoxyphenyl)-2-propanyl]oxy}-3-methoxyphenyl)propyl 6-deoxy-alpha-L-mannopyranoside | C <sub>26</sub> H <sub>36</sub> O <sub>11</sub>               | 547.210  | 4.969  | Lignans, neolignans and related compounds | 1.164        |
| 127 | POS_29936 | Echinone                                                                                                                  | C <sub>40</sub> H <sub>54</sub> O                             | 551.414  | 12.861 | Lipids and lipid-like molecules           | 1.367        |
| 128 | POS_8156  | Genistein                                                                                                                 | C <sub>15</sub> H <sub>10</sub> O <sub>5</sub>                | 271.059  | 5.753  | Phenylpropanoids and polyketides          | 4.520        |
| 129 | POS_27732 | cyclo[DL-Ala-DL-Trp-DL-Ala-DL-Val-Gly]                                                                                    | C <sub>24</sub> H <sub>32</sub> N <sub>6</sub> O <sub>5</sub> | 523.202  | 5.667  | Organic acids and derivatives             | 1.131        |
| 130 | POS_31987 | Diadinoxchrome A                                                                                                          | C <sub>40</sub> H <sub>54</sub> O <sub>3</sub>                | 583.408  | 12.538 | Lipids and lipid-like molecules           | 1.681        |
| 131 | POS_27525 | Anthocyanidin base+3O, O-MalonylHex                                                                                       | C <sub>24</sub> H <sub>24</sub> O <sub>13</sub>               | 521.129  | 5.512  | Phenylpropanoids and polyketides          | 1.595        |
| 132 | POS_33324 | Diosmin                                                                                                                   | C <sub>28</sub> H <sub>32</sub> O <sub>15</sub>               | 609.180  | 5.784  | Phenylpropanoids and polyketides          | 1.323        |
| 133 | POS_2246  | Rosmarinic acid                                                                                                           | C <sub>18</sub> H <sub>16</sub> O <sub>8</sub>                | 163.029  | 2.934  | Phenylpropanoids and                      | 2.958        |

|     |           |                                         |                                                 |         |        |                                  |       |
|-----|-----------|-----------------------------------------|-------------------------------------------------|---------|--------|----------------------------------|-------|
|     |           |                                         |                                                 |         |        | polyketides                      |       |
| 134 | POS_15079 | 5-Hydroxy-2',4',7,8-tetramethoxyflavone | C <sub>19</sub> H <sub>18</sub> O <sub>7</sub>  | 359.110 | 7.988  | Phenylpropanoids and polyketides | 2.939 |
| 135 | POS_25818 | Primeverin                              | C <sub>20</sub> H <sub>28</sub> O <sub>13</sub> | 499.136 | 3.646  | Organic oxygen compounds         | 1.712 |
| 136 | POS_27320 | 6"-O-Malonylgenistin                    | C <sub>24</sub> H <sub>22</sub> O <sub>13</sub> | 519.112 | 5.657  | Phenylpropanoids and polyketides | 3.044 |
| 137 | POS_6214  | Triacetin                               | C <sub>9</sub> H <sub>14</sub> O <sub>6</sub>   | 241.065 | 3.398  | Lipids and lipid-like molecules  | 1.012 |
| 138 | POS_32588 | Luteolin 7-O-rutinoside                 | C <sub>27</sub> H <sub>30</sub> O <sub>15</sub> | 595.165 | 5.321  | Phenylpropanoids and polyketides | 2.245 |
| 139 | POS_4891  | Zizanoic acid                           | C <sub>15</sub> H <sub>22</sub> O <sub>2</sub>  | 217.158 | 9.424  | Lipids and lipid-like molecules  | 1.038 |
| 140 | POS_32507 | Deoxykhivorin                           | C <sub>32</sub> H <sub>42</sub> O <sub>9</sub>  | 593.277 | 12.467 | Organoheterocyclic compounds     | 1.508 |
| 141 | POS_3007  | D-Glucosamine                           | C <sub>6</sub> H <sub>13</sub> NO <sub>5</sub>  | 180.086 | 0.659  | Organic oxygen compounds         | 1.007 |
| 142 | POS_15169 | Palatinose                              | C <sub>12</sub> H <sub>22</sub> O <sub>11</sub> | 360.150 | 0.677  | Organic oxygen compounds         | 2.068 |
| 143 | POS_7201  | Palmitic amide                          | C <sub>16</sub> H <sub>33</sub> NO              | 256.263 | 11.829 | Others                           | 2.805 |

---
